# Supplementary material
Source: Springer Nature journal article supplement (https://www.springermedizin.de/resource/supplementary/12889_2011_3966_MOESM4_ESM.pdf/9491164)
Supplement: MOESM4 [file 9491164]

Table 2 Comparison of psychosocial, socioedmographic and behavioral factors in participants not living alone versus those living alone. The Health 2000 Study, n=3471.

|                                               | n (%)            |              |             |                    |
|-----------------------------------------------|------------------|--------------|-------------|--------------------|
| Characteristic                                | Not living alone | Living alone | All         | <i>P</i> for alone |
|                                               | (n=2967)         | (n=504)      | (n=3471)    | vs. not alone      |
| Psychosocial factors: <sup>a</sup>            |                  |              |             |                    |
| Poor job climate                              | 1016 (34.3)      | 210 (42.0)   | 1226 (35.3) | 0.002              |
| Lack of support at the workplace              | 999 (33.8)       | 170 (34.0)   | 1169 (33.7) | 0.923              |
| Lack of social support in private life        | 984 (33.3)       | 242 (48.2)   | 1226 (35.3) | <0.001             |
| High cynical hostility                        | 760 (25.8)       | 161 (32.3)   | 921 (26.5)  | 0.004              |
| Sociodemographic factors:                     |                  |              |             |                    |
| Low occupational grade (blue-collar)          | 996 (34.1)       | 188 (38.1)   | 1184 (34.1) | 0.089              |
| Lack of secondary education                   | 648 (22.2)       | 123 (24.7)   | 771 (22.2)  | 0.238              |
| Low income (<50% of national median)          | 338 (11.2)       | 57 (11.3)    | 395 (11.4)  | 0.940              |
| Temporarily outside working life <sup>b</sup> | 238 (7.8)        | 54 (10.5)    | 292 (8.4)   | 0.060              |
| Urban residency                               | 1873 (63.3)      | 378 (74.8)   | 2251 (64.9) | <0.001             |
| Living at rent                                | 560 (18.7)       | 221 (43.4)   | 781 (22.5)  | <0.001             |
| Poor housing conditions <sup>c</sup>          | 272 (9.1)        | 65 (12.7)    | 337 (9.7)   | 0.029              |
| Health behaviors:                             |                  |              |             |                    |
| Daily smokers                                 | 716 (24.3)       | 154 (30.7)   | 870 (25.1)  | 0.002              |
| Heavy alcohol use <sup>d</sup>                | 302 (10.4)       | 74 (15.0)    | 376 (10.8)  | 0.005              |
| Infrequent physical activity <sup>e</sup>     | 635 (21.3)       | 125 (24.6)   | 760 (21.9)  | 0.107              |
| Obesity (BMI≥30)                              | 554 (18.9)       | 96 (18.9)    | 650 (18.7)  | 0.990              |

<sup>a</sup>The highest tertile is the cut-off point.

<sup>b</sup>Unemployed, home-maker, full-time student, or retired during past 12 months.

<sup>c</sup>At least 2 of the following: draft, noise, dust or dirt, dampness, chilliness, crowding, fear.

<sup>d</sup>According to WHO definintion: >20g for women per day,>40g for men per day

<sup>e</sup>Less than 4 times per week of any activity, including moderate activity such as walking
